# Supplementary material for: Effect of Traditional Chinese Medicine on Long-Term Outcomes of Snakebite in Taiwan
Source: MDPI journal article supplement (doi:10.3390/toxins12020132), 2020-02-20
Supplement: s1 [file s1]

# Supplementary Materials: Effect of Traditional Chinese Medicine on Long-Term Outcomes of Snakebite in Taiwan

Teng-I Huang and Ching-Liang Hsieh \*

Table S1. Review Matrix on the Use of Effect of traditional Chinese medicine on long-term outcomes of snakebite in Taiwan.

| Reference | Author(s)                                                                  | Title                                                                                                                           | Journal/Year Published                   | Database | Filter                      | Excluded Reason                                       |
|-----------|----------------------------------------------------------------------------|---------------------------------------------------------------------------------------------------------------------------------|------------------------------------------|----------|-----------------------------|-------------------------------------------------------|
|           | Zhang H, Li C, Kwok ST, Zhang QW, Chan SW                                  | A Review of the Pharmacological Effects of the Dried Root of <i>Polygonum cuspidatum</i> (Hu Zhang) and Its Constituents.       | Evid Based Complement Alternat Med. 2013 | PubMed   |                             | Not related to snakebite envenomation in the abstract |
|           | Fu R, Zhang Y, Peng T, Guo Y, Chen F.                                      | Phenolic composition and effects on allergic contact dermatitis of phenolic extracts <i>Sapium sebiferum</i> (L.) Roxb. leaves. | J Ethnopharmacol. 2015                   | PubMed   |                             | Not related to snakebite envenomation in the abstract |
|           | Fu R, Zhang YT, Guo YR, Huang QL, Peng T, Xu Y, Tang L, Chen F.            | Antioxidant and anti-inflammatory activities of the phenolic extracts of <i>Sapium sebiferum</i> (L.) Roxb. leaves.             | J Ethnopharmacol. 2013                   | PubMed   |                             | Not related to snakebite envenomation in the abstract |
|           | Ni YS, Sun AZ, Bao JY.                                                     | [503 cases of pallas pit viper bite with traditional Chinese medicine and Western medicine treatment].                          | Zhong Xi Yi Jie He Za Zhi. 1990          | PubMed   | Not available for full text |                                                       |
|           | Miao YN, Chen MC, Huang Z.                                                 | [Clinical observation on treatment of snake bite induced disseminated intravascular coagulation by qinwen baidu decoction].     | Zhongguo Zhong Xi Yi Jie He Za Zhi. 2003 | PubMed   | Not available for full text |                                                       |
|           | Gomes A, Das R, Sarkhel S, Mishra R, Mukherjee S, Bhattacharya S, Gomes A. | Herbs and herbal constituents active against snake bite.                                                                        | Indian J Exp Biol. 2010                  | PubMed   |                             | Herbs that are not available in Taiwan                |

|                                                                                     |                                                                                                                                     |                                         |        |                             |                                                       |
|-------------------------------------------------------------------------------------|-------------------------------------------------------------------------------------------------------------------------------------|-----------------------------------------|--------|-----------------------------|-------------------------------------------------------|
| Upasani MS, Upasani SV, Beldar VG, Beldar CG, Gujarathi PP.                         | Infrequent use of medicinal plants from India in snakebite treatment.                                                               | Integr Med Res. 2018                    | PubMed |                             | Herbs that are not available in Taiwan                |
| Yirgu A, Chippaux JP.                                                               | Ethnomedicinal plants used for snakebite treatments in Ethiopia: a comprehensive overview.                                          | J Venom Anim Toxins Incl Trop Dis. 2019 | PubMed |                             | Herbs that are not available in Taiwan                |
| Habib AG.                                                                           | Tetanus complicating snakebite in northern Nigeria: clinical presentation and public health implications.                           | Acta Trop. 2003                         | PubMed | Not available for full text |                                                       |
| Salama R, Sattayasai J, Gande AK, Sattayasai N, Davis M, Lattmann E.                | Identification and evaluation of agents isolated from traditionally used herbs against Ophiophagus hannah venom.                    | Drug Discov Ther. 2012                  | PubMed |                             | Herbs that are not available in Taiwan                |
| Coe FG, Anderson GJ.                                                                | Snakebite ethnopharmacopoeia of eastern Nicaragua.                                                                                  | J Ethnopharmacol. 2005                  | PubMed |                             | Herbs that are not available in Taiwan                |
| Vásquez J, Jiménez SL, Gómez IC, Rey JP, Henao AM, Marín DM, Romero JO, Alarcón JC. | Snakebites and ethnobotany in the Eastern region of Antioquia, Colombia--the traditional use of plants.                             | J Ethnopharmacol. 2013                  | PubMed |                             | Herbs that are not available in Taiwan                |
| Gómez-Betancur I, Benjumea D.                                                       | Traditional use of the genus Renealmia and Renealmia alpinia (Rottb.) Maas (Zingiberaceae)-a review in the treatment of snakebites. | Asian Pac J Trop Med. 2014              | PubMed |                             | Herbs that are not available in Taiwan                |
| Habib AG, Gebi UI, Onyemelukwe GC.                                                  | Snake bite in Nigeria.                                                                                                              | Afr J Med Med Sci. 2001                 | PubMed | Not available for full text |                                                       |
| Caro D, Ocampo Y, Castro J, Barrios L, Salas R, Franco LA.                          | Protective effect of Dracontium dubium against Bothrops asper venom.                                                                | Biomed Pharmacother. 2017               | PubMed |                             | Herbs that are not available in Taiwan                |
| Verdan MH, Stefanello MÉ.                                                           | Secondary metabolites and biological properties of Gesneriaceae species.                                                            | Chem Biodivers. 2012                    | PubMed |                             | Not related to snakebite envenomation in the abstract |

|                                                                                                                                                                                   |                                                                                                                                                                                                                             |                                          |        |                                                       |
|-----------------------------------------------------------------------------------------------------------------------------------------------------------------------------------|-----------------------------------------------------------------------------------------------------------------------------------------------------------------------------------------------------------------------------|------------------------------------------|--------|-------------------------------------------------------|
| Wei NN, Lv HN, Wu Y, Yang SL, Sun XY, Lai R, Jiang Y, Wang K.                                                                                                                     | Selective Activation of Nociceptor TRPV1 Channel and Reversal of Inflammatory Pain in Mice by a Novel Coumarin Derivative Muralatin L from <i>Murraya alata</i> .                                                           | J Biol Chem. 2016                        | PubMed | Not related to snakebite envenomation in the abstract |
| Gakuya DW, Itonga SM, Mbaria JM, Muthee JK, Musau JK.                                                                                                                             | Ethnobotanical survey of biopesticides and other medicinal plants traditionally used in Meru central district of Kenya.                                                                                                     | J Ethnopharmacol. 2013                   | PubMed | Herbs that are not available in Taiwan                |
| Fatima S, Javed T, Khalid S, Shaheen N, Aslam N, Latif M, Siddique FA, Bibi S, Mohsin S, Yameen MA, Ali Abid SM, Khan SA, Najam A, Afzal K, Hasan SMF, McCleary RJ, Bin Asad MHH. | Evaluation of different Pakistani medicinal plants for inhibitory potential against <i>Echis carinatus</i> induced Phospholipase A2 toxicity.                                                                               | Pak J Pharm Sci. 2019                    | PubMed | Herbs that are not available in Taiwan                |
| Zhu J, Lin S.                                                                                                                                                                     | [Investigation on folk medicine and health care of She ethnic group in Zhejiang province].                                                                                                                                  | Zhonghua Yi Shi Za Zhi. 2002             | PubMed | Not available for full text                           |
| Alam MI, Gomes A.                                                                                                                                                                 | Adjuvant effects and antiserum action potentiation by a (herbal) compound 2-hydroxy-4-methoxy benzoic acid isolated from the root extract of the Indian medicinal plant 'sarsaparilla' ( <i>Hemidesmus indicus</i> R. Br.). | Toxicon. 1998                            | PubMed | Herbs that are not available in Taiwan                |
| Yang LC, Wang F, Liu M.                                                                                                                                                           | A study of an endothelin antagonist from a Chinese anti-snake venom medicinal herb.                                                                                                                                         | J Cardiovasc Pharmacol. 1998             | PubMed | Not available for full text                           |
| Gori L, Gallo E, Mascherini V, Mugelli A, Vannacci A, Firenzuoli F.                                                                                                               | Can estragole in fennel seed decoctions really be considered a danger for human health? A fennel safety update.                                                                                                             | Evid Based Complement Alternat Med. 2012 | PubMed | Not related to snakebite envenomation in the abstract |
| Harsha VH, Hebbar SS, Hegde GR, Shripathi V.                                                                                                                                      | Ethnomedical knowledge of plants used by Kunabi Tribe of Karnataka in India.                                                                                                                                                | Fitoterapia. 2002                        | PubMed | Herbs that are not available in Taiwan                |

|                                                                                                                                              |                                                                                                             |                                  |        |                                                                            |
|----------------------------------------------------------------------------------------------------------------------------------------------|-------------------------------------------------------------------------------------------------------------|----------------------------------|--------|----------------------------------------------------------------------------|
| Habib AG, Brown NI.                                                                                                                          | The snakebite problem and antivenom crisis from a health-economic perspective.                              | Toxicon. 2018                    | PubMed | Not related to longterm effects of snakebite envenomation in the abstract  |
| Hornbeak KB, Auerbach PS.                                                                                                                    | Marine Envenomation.                                                                                        | Emerg Med Clin North Am. 2017    | PubMed | Not related to the common snakebite envenomation in Taiwan                 |
| Vaiyapuri S, Vaiyapuri R, Ashokan R, Ramasamy K, Nattamaisundar K, Jeyaraj A, Chandran V, Gajjeraman P, Baksh MF, Gibbins JM, Hutchinson EG. | Snakebite and its socio-economic impact on the rural population of Tamil Nadu, India.                       | PLoS One. 2013                   | PubMed | No related to TCM                                                          |
| Slagboom J, Kool J, Harrison RA, Casewell NR.                                                                                                | Haemotoxic snake venoms: their functional activity, impact on snakebite victims and pharmaceutical promise. | Br J Haematol. 2017              | PubMed | Not related to longterm effects of snakebite envenomation in the full text |
| Waiddyanatha S, Silva A, Siribaddana S, Isbister GK.                                                                                         | Long-term Effects of Snake Envenoming.                                                                      | Toxins (Basel). 2019             | PubMed |                                                                            |
| Jayawardana S, Gnanathanan A, Arambepola C, Chang T.                                                                                         | Chronic Musculoskeletal Disabilities following Snake Envenoming in Sri Lanka: A Population-Based Study.     | PLoS Negl Trop Dis. 2016         | PubMed |                                                                            |
| Williams HF, Layfield HJ, Vallance T, Patel K, Bicknell AB, Trim SA, Vaiyapuri S.                                                            | The Urgent Need to Develop Novel Strategies for the Diagnosis and Treatment of Snakebites.                  | Toxins (Basel). 2019             | PubMed | Not related to longterm effects of snakebite envenomation in the full text |
| Naqvi R.                                                                                                                                     | Snake-bite-induced Acute Kidney Injury.                                                                     | J Coll Physicians Surg Pak. 2016 | PubMed | Not related to longterm effects of snakebite                               |

|                                                                                                                             |                                                                                                                                                             |                              |        |                                                                                        |
|-----------------------------------------------------------------------------------------------------------------------------|-------------------------------------------------------------------------------------------------------------------------------------------------------------|------------------------------|--------|----------------------------------------------------------------------------------------|
| He X, Wang X, Fang J, Chang Y, Ning N, Guo H, Huang L, Huang X.                                                             | The genus <i>Achyranthes</i> : A review on traditional uses, phytochemistry, and pharmacological activities.                                                | J Ethnopharmacol. 2017       | PubMed | envenomation in the full text<br>Not related to snakebite envenomation in the abstract |
| Jayawardana S, Arambepola C, Chang T, Gnanathasan A.                                                                        | Long-term health complications following snake envenoming.                                                                                                  | J Multidiscip Healthc. 2018  | PubMed |                                                                                        |
| Galizio NDC, Serino-Silva C, Stuginski DR, Abreu PAE, Sant'Anna SS, Grego KF, Tashima AK, Tanaka-Azevedo AM, Morais-Zani K. | Compositional and functional investigation of individual and pooled venoms from long-term captive and recently wild-caught <i>Bothrops jararaca</i> snakes. | J Proteomics. 2018           | PubMed | Not related to longterm effects of snakebite envenomation in the abstract              |
| Silva A, Maduwage K, Sedgwick M, Pilapitiya S, Weerawansa P, Dahanayaka NJ, Buckley NA, Siribaddana S, Isbister GK.         | Neurotoxicity in Russell's viper ( <i>Daboia russelii</i> ) envenoming in Sri Lanka: a clinical and neurophysiological study.                               | Clin Toxicol (Phila). 2016   | PubMed |                                                                                        |
| Spano SJ, Vohra R, Macias F.                                                                                                | Long-term complications of rattlesnake bites: a telephone survey from Central California.                                                                   | Wilderness Environ Med. 2014 | PubMed |                                                                                        |
| Freiermuth CE, Lavonas EJ, Anderson VE, Kleinschmidt KC, Sharma K, Rapp-Olsson M, Gerardo C; Copperhead Recovery Workgroup. | Antivenom Treatment Is Associated with Fewer Patients using Opioids after Copperhead Envenomation.                                                          | West J Emerg Med. 2019       | PubMed | Not related to longterm effects of snakebite envenomation in the abstract              |
| Sebastin Santhosh M, Hemshekhar M, Thushara RM, Devaraja S, Kemparaju K, Girish KS.                                         | <i>Vipera russelli</i> venom-induced oxidative stress and hematological alterations: amelioration by crocin a dietary colorant.                             | Cell Biochem Funct. 2013     | PubMed | Not related to longterm effects of snakebite envenomation in the full text             |
| Plowman DM, Reynolds TL, Joyce SM.                                                                                          | Poisonous snakebite in Utah.                                                                                                                                | West J Med. 1995             | PubMed | Not related to longterm effects of snakebite                                           |

|                                                                                                        |                                                                                                                                                                                                          |                                          |        |                                                                                                           |
|--------------------------------------------------------------------------------------------------------|----------------------------------------------------------------------------------------------------------------------------------------------------------------------------------------------------------|------------------------------------------|--------|-----------------------------------------------------------------------------------------------------------|
| Gilliam LL, Holbrook TC, Ownby CL, McFarlane D, Sleeper MM, Martin S, Levis K, Payton ME.              | Cardiotoxicity, inflammation, and immune response after rattlesnake envenomation in the horse.                                                                                                           | J Vet Intern Med. 2012                   | PubMed | envenomation in the abstract<br>Not related to longterm effects of snakebite envenomation in the abstract |
| Bachsais N, Boussag-Abib L, Laraba-Djebari F.                                                          | Safety and efficiency of active immunization with detoxified antigen against scorpion venom: side effect evaluation.                                                                                     | Inflamm Res. 2017                        | PubMed | Not related to longterm effects of snakebite envenomation in the abstract                                 |
| Rodríguez-Abarca S, Corrales G, Chacón D, Guevara M, Esquivel C, Arroyo C, Gómez A.                    | Morphological alterations caused by manual venom extraction on the main venom gland of Bothrops asper and Crotalus simus snakes (Serpentes: Viperidae): Long-term implications for antivenom production. | Toxicon. 2019                            | PubMed | Not related to longterm effects of snakebite envenomation in the abstract                                 |
| Herath HM, Wazil AW, Abeysekara DT, Jeewani ND, Weerakoon KG, Ratnatunga NV, Bandara EH, Kularatne SA. | Chronic kidney disease in snake envenomed patients with acute kidney injury in Sri Lanka: a descriptive study.                                                                                           | Postgrad Med J. 2012                     | PubMed |                                                                                                           |
| Sinha R, Nandi M, Tullus K, Marks SD, Taraphder A.                                                     | Ten-year follow-up of children after acute renal failure from a developing country.                                                                                                                      | Nephrol Dial Transplant. 2009            | PubMed | Not related to snakebite envenomation in the abstract                                                     |
| Gwaltney-Brant SM, Rumbeiha WK.                                                                        | Newer antidotal therapies.                                                                                                                                                                               | Vet Clin North Am Small Anim Pract. 2002 | PubMed | Not related to snakebite envenomation in the abstract                                                     |
| Smyrnioudis ME, O'Rourke DP, Rosenbaum MD, Brewer KL, Meggs WJ.                                        | Long-term efficacy of pressure immobilization bandages in a porcine model of coral snake envenomation.                                                                                                   | Am J Emerg Med. 2014                     | PubMed | Not related to TCM or herbs                                                                               |

|                                                                                                |                                                                                                                           |                            |        |                                                                           |
|------------------------------------------------------------------------------------------------|---------------------------------------------------------------------------------------------------------------------------|----------------------------|--------|---------------------------------------------------------------------------|
| Al-Abdulla I, Casewell NR, Landon J.                                                           | Long-term physicochemical and immunological stability of a liquid formulated intact ovine immunoglobulin-based antivenom. | Toxicon. 2013              | PubMed | Not related to TCM or herbs                                               |
| White J.                                                                                       | Venomous animals: clinical toxinology.                                                                                    | EXS. 2010                  | PubMed | Not related to longterm effects of snakebite envenomation in the abstract |
| Srivastava RN.                                                                                 | Pediatric renal problems in India.                                                                                        | Pediatr Nephrol. 1987      | PubMed | Not related to snakebite envenomation in the abstract                     |
| Lavonas EJ, Gerardo CJ, O'Malley G, Arnold TC, Bush SP, Banner W Jr, Steffens M, Kerns WP 2nd. | Initial experience with Crotalidae polyvalent immune Fab (ovine) antivenom in the treatment of copperhead snakebite.      | Ann Emerg Med. 2004        | PubMed | Not related to longterm effects of snakebite envenomation in the abstract |
| Shaw BA, Hosalkar HS.                                                                          | Rattlesnake bites in children: antivenin treatment and surgical indications.                                              | J Bone Joint Surg Am. 2002 | PubMed | Not related to longterm effects of snakebite envenomation in the abstract |
| Waikhom R, Sircar D, Patil K, Bennikal M, Gupta SD, Pandey R.                                  | Long-term renal outcome of snake bite and acute kidney injury: a single-center experience.                                | Ren Fail. 2012             | PubMed |                                                                           |
| Rahimi-Movaghar V.                                                                             | Controlled evaluation of injury in an international Safe Community: Kashmar, Iran.                                        | Public Health. 2010        | PubMed | Not related to snakebite envenomation in the abstract                     |
| Freitas-de-Sousa LA, Amazonas DR, Sousa LF, Sant'Anna SS, Nishiyama MY Jr, Serrano SM,         | Comparison of venoms from wild and long-term captive Bothrops atrox snakes                                                | Biochimie. 2015            | PubMed | Not related to longterm effects of                                        |

|                                                                                                                      |                                                                                                                        |                                  |        |                             |                                                                            |
|----------------------------------------------------------------------------------------------------------------------|------------------------------------------------------------------------------------------------------------------------|----------------------------------|--------|-----------------------------|----------------------------------------------------------------------------|
| Junqueira-de-Azevedo IL, Chalkidis HM, Moura-da-Silva AM, Mourão RH.                                                 | and characterization of Batroxrhagin, the predominant class PIII metalloproteinase from the venom of this species.     |                                  |        |                             | snakebite envenomation in the abstract                                     |
| Golay V, Roychowdhary A, Pandey R, Singh A, Pasari A, Abraham A.                                                     | Acute interstitial nephritis in patients with viperine snake bite: single center experience of a rare presentation.    | Saudi J Kidney Dis Transpl. 2012 | PubMed |                             | Not related to longterm effects of snakebite envenomation in the full text |
| Teixeira PH, Thel Tdo N, Ferreira JM, de Azevedo SM Jr, Junior WR, Lyra-Neves RM.                                    | Local knowledge and exploitation of the avian fauna by a rural community in the semi-arid zone of northeastern Brazil. | J Ethnobiol Ethnomed. 2014       | PubMed |                             | Not related to snakebite envenomation in the abstract                      |
| Copcu E.                                                                                                             | Marjolin's ulcer: a preventable complication of burns?                                                                 | Plast Reconstr Surg. 2009        | PubMed |                             | Not related to snakebite envenomation in the abstract                      |
| Bell DJ, Wijegunasinghe D, Samarakoon S, Palipana H, Gunasekera S, de Silva HA, Lalloo DG, Ranawaka UK, de Silva HJ. | Neurophysiological findings in patients 1 year after snake bite induced neurotoxicity in Sri Lanka.                    | Trans R Soc Trop Med Hyg. 2010   | PubMed |                             |                                                                            |
| Zanon V, Morri A, Lonati D, Paoli A, Camporesi EM, Bosco G.                                                          | HBO <sub>2</sub> in snake envenomation (atrox albinus rattlesnake): a case report in a human.                          | Undersea Hyperb Med. 2016        | PubMed |                             | Not related to longterm effects of snakebite envenomation in the abstract  |
| Jeng JC, Fidler PE, Sokolich JC, Jaskille AD, Khan S, White PM, Street JH 3rd, Light TD, Jordan MH.                  | Seven years' experience with Integra as a reconstructive tool.                                                         | J Burn Care Res. 2007            | PubMed |                             | Not related to snakebite envenomation in the abstract                      |
| Cowin DJ, Wright T, Cowin JA.                                                                                        | Long-term complications of snake bites to the upper extremity.                                                         | J South Orthop Assoc. 1998       | PubMed | Not available for full text |                                                                            |



|                                                                                                |                                                                                                                |                             |        |                                                            |                                                                           |
|------------------------------------------------------------------------------------------------|----------------------------------------------------------------------------------------------------------------|-----------------------------|--------|------------------------------------------------------------|---------------------------------------------------------------------------|
| Proby C, Tha-Aung, Thet-Win, Hla-Mon, Burrin JM, Joplin GF.                                    | Immediate and long-term effects on hormone levels following bites by the Burmese Russell's viper.              | Q J Med. 1990               | PubMed | Not available for full text<br>Not available for full text |                                                                           |
| Weber RA, White RR 4th.                                                                        | Crotalidae envenomation in children.                                                                           | Ann Plast Surg. 1993        | PubMed |                                                            |                                                                           |
| Carneiro SM, Zablit MB, Kerchove CM, Moura-da-Silva AM, Quissell DO, Markus RP, Yamanouye N.   | Venom production in long-term primary culture of secretory cells of the Bothrops jararaca venom gland.         | Toxicon. 2006               | PubMed |                                                            | Not related to longterm effects of snakebite envenomation in the abstract |
| Lewandowski K, Homenda W, Mital A, Complak A, Hellmann A.                                      | Erythrophagocytosis by neutrophils--a rare morphological phenomenon resulting in acquired haemolytic anaemia?  | Int J Lab Hematol. 2011     | PubMed |                                                            | Not related to snakebite envenomation in the abstract                     |
| Lunyera J, Mohottige D, Von Isenburg M, Jeuland M, Patel UD, Stanifer JW.                      | CKD of Uncertain Etiology: A Systematic Review.                                                                | Clin J Am Soc Nephrol. 2016 | PubMed |                                                            | Not related to snakebite envenomation in the abstract                     |
| Naik BN, Bhalla A, Sharma N, Mokta J, Singh S, Gupta P, Rai A, Subbiah S, Bhansali A, Dutta P. | Pituitary dysfunction in survivors of Russell's viper snake bite envenomation: A prospective study.            | Neurol India. 2018          | PubMed |                                                            |                                                                           |
| Pulimaddi R, Parveda AR, Brahmanpally B, Kalakanda PM, Ramakrishna K, Chinnapaka VRD.          | Incidence & prognosis of acute kidney injury in individuals of snakebite in a tertiary care hospital in India. | Indian J Med Res. 2017      | PubMed |                                                            | Not related to longterm effects of snakebite envenomation in the abstract |
| Tsai YH, Hsu WH, Huang KC, Yu PA, Chen CL, Kuo LT.                                             | Necrotizing fasciitis following venomous snakebites in a tertiary hospital of southwest Taiwan.                | Int J Infect Dis. 2017      | PubMed |                                                            |                                                                           |

|                                                                              |                                                                                                                                                   |                                |        |                                                                            |
|------------------------------------------------------------------------------|---------------------------------------------------------------------------------------------------------------------------------------------------|--------------------------------|--------|----------------------------------------------------------------------------|
| Bailly C.                                                                    | Cepharanthine: An update of its mode of action, pharmacological properties and medical applications.                                              | Phytomedicine. 2019            | PubMed | Not related to snakebite envenomation in the abstract                      |
| Gutiérrez JM, Williams D, Fan HW, Warrell DA.                                | Snakebite envenoming from a global perspective: Towards an integrated approach.                                                                   | Toxicon. 2010                  | PubMed | Not related to longterm effects of snakebite envenomation in the abstract  |
| Weinstein SA, Mirtschin PJ, Tristram H, Lawton L, White J.                   | Local morbidity from red-bellied black snake ( <i>Pseudechis porphyriacus</i> , Elapidae) envenoming: Two cases and a brief review of management. | Toxicon. 2018                  | PubMed | Not related to the common snakebite envenomation in Taiwan                 |
| Mohamed F, Endre ZH, Buckley NA.                                             | Role of biomarkers of nephrotoxic acute kidney injury in deliberate poisoning and envenomation in less developed countries.                       | Br J Clin Pharmacol. 2015      | PubMed | Not related to snakebite envenomation in the abstract                      |
| Rajagopala S, Thabah MM, Ariga KK, Gopalakrishnan M.                         | Acute hypopituitarism complicating Russell's viper envenomation: case series and systematic review.                                               | QJM. 2015                      | PubMed | Not related to longterm effects of snakebite envenomation in the full text |
| Tun-Pe, Phillips RE, Warrell DA, Moore RA, Tin-Nu-Swe, Myint-Lwin, Burke CW. | Acute and chronic pituitary failure resembling Sheehan's syndrome following bites by Russell's viper in Burma.                                    | Lancet. 1987                   | PubMed |                                                                            |
| Rathnayaka RMMKN, Ranathunga PEAN, Kularatne SAM.                            | Kidney injury following envenoming by hump-nosed pit viper (Genus: <i>Hypnale</i> ) in Sri Lanka: proven and probable cases.                      | Trans R Soc Trop Med Hyg. 2019 | PubMed | Not related to the common snakebite envenomation in Taiwan                 |
| Kaaviya R, Vadivelan M, Balamurugan N, Parameswaran S, Thabah MM.            | Community Acquired AKI: A Prospective Observational Study from a Tertiary Level Hospital in Southern India.                                       | Indian J Nephrol. 2019         | PubMed | Not related to snakebite                                                   |

|                                                                                          |                                                                                                                                         |                              |        |                                                                                                           |
|------------------------------------------------------------------------------------------|-----------------------------------------------------------------------------------------------------------------------------------------|------------------------------|--------|-----------------------------------------------------------------------------------------------------------|
| Pourreau F, Pinsard M, Goyffon M, Plasse F, Desport E, Thierry A, Touchard G, Bridoux F. | Bilateral renal cortical necrosis with end-stage renal failure following envenoming by <i>Proatheris superciliaris</i> : a case report. | Toxicon. 2014                | PubMed | envenomation in the abstract<br>Not related to longterm effects of snakebite envenomation in the abstract |
| Brown N, Landon J.                                                                       | Antivenom: the most cost-effective treatment in the world?                                                                              | Toxicon. 2010                | PubMed | Not related to TCM or herbs<br>Not related to longterm effects of snakebite envenomation in the abstract  |
| Mukhopadhyay S, Ghosh A, Kar M.                                                          | Methylglyoxal increase in uremia with special reference to snakebite-mediated acute renal failure.                                      | Clin Chim Acta. 2008         | PubMed | Not related to longterm effects of snakebite envenomation in the abstract                                 |
| Anwar M, Green J, Norris P.                                                              | Health-seeking behaviour in Pakistan: a narrative review of the existing literature.                                                    | Public Health. 2012          | PubMed | Not related to snakebite envenomation in the abstract                                                     |
| Claunch NM, Holding ML, Escallón C, Vernasco B, Moore IT, Taylor EN.                     | Good vibrations: Assessing the stability of snake venom composition after researcher-induced disturbance in the laboratory.             | Toxicon. 2017                | PubMed | Not related to snakebite envenomation in the abstract                                                     |
| Fitzgerald KT, Shipley BK, Newquist KL, Vera R, Flood AA.                                | Additional observations and notes on the natural history of the prairie rattlesnake ( <i>Crotalus viridis</i> ) in Colorado.            | Top Companion Anim Med. 2013 | PubMed | Not related to snakebite envenomation in the abstract                                                     |
| Bowie EJ, Owen CA.                                                                       | The clinical pathology of intravascular coagulation.                                                                                    | Bibl Haematol. 1983          | PubMed | Not related to snakebite envenomation in the abstract                                                     |
| Stewart MJ.                                                                              | South Africa: a toxicologist's goldmine.                                                                                                | Ther Drug Monit. 2002        | PubMed | Not related to snakebite                                                                                  |

|                                                                                                                                                                                                                                  |                                                                                                                                    |                                         |        |                                                                                       |
|----------------------------------------------------------------------------------------------------------------------------------------------------------------------------------------------------------------------------------|------------------------------------------------------------------------------------------------------------------------------------|-----------------------------------------|--------|---------------------------------------------------------------------------------------|
| Rogosnitzky M, Danks R.                                                                                                                                                                                                          | Therapeutic potential of the biscoclaurine alkaloid, cepharanthine, for a range of clinical conditions.                            | Pharmacol Rep. 2011                     | PubMed | envenomation in the abstract<br>Not related to snakebite envenomation in the abstract |
| Rao KM, Kumar RH, Krishna KS, Bhaskar V, Laxmaiah A.                                                                                                                                                                             | Diet & nutrition profile of Chenchu population - A vulnerable tribe in Telangana & Andhra Pradesh, India.                          | Indian J Med Res. 2015                  | PubMed | Not related to snakebite envenomation in the abstract                                 |
| Boonpucknavig V, Soontornniyomkij V.                                                                                                                                                                                             | Pathology of renal diseases in the tropics.                                                                                        | Semin Nephrol. 2003                     | PubMed | Not related to snakebite envenomation in the abstract                                 |
| Milani Júnior R, Jorge MT, de Campos FP, Martins FP, Bousso A, Cardoso JL, Ribeiro LA, Fan HW, França FO, Sano-Martins IS, Cardoso D, Ide Fernandez C, Fernandes JC, Aldred VL, Sandoval MP, Puerto G, Theakston RD, Warrell DA. | Snake bites by the jararacuçu (Bothrops jararacussu): clinicopathological studies of 29 proven cases in São Paulo State, Brazil.   | QJM. 1997                               | PubMed | Not related to longterm effects of snakebite envenomation in the full text            |
| Silva A, Samarasinghe R, Pilapitiya S, Dahanayake N, Siribaddana S.                                                                                                                                                              | Viper bites complicate chronic agrochemical nephropathy in rural Sri Lanka.                                                        | J Venom Anim Toxins Incl Trop Dis. 2014 | PubMed |                                                                                       |
| Abib H, Laraba-Djebbari F.                                                                                                                                                                                                       | Effects of 60Co gamma radiation on toxicity and hemorrhagic, myonecrotic, and edema-forming activities of Cerastes cerastes venom. | Can J Physiol Pharmacol. 2003           | PubMed | Not related to longterm effects of snakebite envenomation in the abstract             |
| Sweni S, Meenakshisundaram R, Sakthirajan R, Rajendiran C, Thirumalaikolundusubramanian P.                                                                                                                                       | Acute renal failure in acute poisoning: prospective study from a tertiary care centre of South India.                              | J Ren Care. 2012                        | PubMed | Not related to longterm effects of snakebite envenomation in the full text            |

|                                                                    |                                                                                                                                                                             |                                |        |                                                                            |
|--------------------------------------------------------------------|-----------------------------------------------------------------------------------------------------------------------------------------------------------------------------|--------------------------------|--------|----------------------------------------------------------------------------|
| Dickinson CE, Traub-Dargatz JL, Dargatz DA, Bennett DG, Knight AP. | Rattlesnake venom poisoning in horses: 32 cases (1973-1993).                                                                                                                | J Am Vet Med Assoc. 1996       | PubMed | Not related to snakebite envenomation in human in the abstract             |
| Bhattacharjee P, Bhattacharyya D.                                  | Characterization of the aqueous extract of the root of Aristolochia indica: evaluation of its traditional use as an antidote for snake bites.                               | J Ethnopharmacol. 2013         | PubMed | Not related to longterm effects of snakebite envenomation in the full text |
| Golay V, Roychowdhary A, Dasgupta S, Pandey R.                     | Hypopituitarism in patients with vasculotoxic snake bite envenomation related acute kidney injury: a prospective study on the prevalence and outcomes of this complication. | Pituitary. 2014                | PubMed |                                                                            |
| Jurkovich GJ, Luterman A, McCullar K, Ramenofsky ML, Curreri PW.   | Complications of Crotalidae antivenin therapy.                                                                                                                              | J Trauma. 1988                 | PubMed | Not related to longterm effects of snakebite envenomation in the full text |
| da Silva OA, López M, Godoy P.                                     | Intensive care unit treatment of acute renal failure following snake bite.                                                                                                  | Am J Trop Med Hyg. 1979        | PubMed | Not related to longterm effects of snakebite envenomation in the full text |
| Caiaffa WT, Vlahov D, Antunes CM, de Oliveira HR, Diniz CR.        | Snake bite and antivenom complications in Belo Horizonte, Brazil.                                                                                                           | Trans R Soc Trop Med Hyg. 1994 | PubMed | Not related to TCM                                                         |
| da Silva OA, López M, Godoy P.                                     | Bilateral cortical necrosis and calcification of the kidneys following snakebite: a case report.                                                                            | Clin Nephrol. 1979             | PubMed | Not available for full text                                                |

|                                                                                                                            |                                                                                                                                        |                               |        |                             |                                                                            |
|----------------------------------------------------------------------------------------------------------------------------|----------------------------------------------------------------------------------------------------------------------------------------|-------------------------------|--------|-----------------------------|----------------------------------------------------------------------------|
| Al-Homrany M.                                                                                                              | Epidemiology of acute renal failure in hospitalized patients: experience from southern Saudi Arabia.                                   | East Mediterr Health J. 2003  | PubMed |                             | Not related to longterm effects of snakebite envenomation in the full text |
| Herath N, Wazil A, Kularatne S, Ratnatunga N, Weerakoon K, Badurdeen S, Rajakrishna P, Nanayakkara N, Dharmagunawardane D. | Thrombotic microangiopathy and acute kidney injury in hump-nosed viper (Hypnale species) envenoming: a descriptive study in Sri Lanka. | Toxicon. 2012                 | PubMed |                             | Not related to longterm effects of snakebite envenomation in the full text |
| Johnson HA.                                                                                                                | The foot that stalled a thousand ships: a controversial case from the 13th century BCE.                                                | J R Soc Med. 2003             | PubMed |                             | Not related to snakebite envenomation in the abstract                      |
| Boyer LV, Seifert SA, Clark RF, McNally JT, Williams SR, Nordt SP, Walter FG, Dart RC.                                     | Recurrent and persistent coagulopathy following pit viper envenomation.                                                                | Arch Intern Med. 1999         | PubMed | Not available for full text |                                                                            |
| Ilic N, Schmidt BM, Poulev A, Raskin I.                                                                                    | Toxicological evaluation of grains of paradise (Aframomum melegueta) [Roscoe] K. Schum.                                                | J Ethnopharmacol. 2010        | PubMed |                             | Not related to snakebite envenomation in the abstract                      |
| Denis D, Lamireau T, Llanas B, Bedry R, Fayon M.                                                                           | Rhabdomyolysis in European viper bite.                                                                                                 | Acta Paediatr. 1998           | PubMed |                             | Not related to longterm effects of snakebite envenomation in the full text |
| Makis A, Kattamis A, Grammeniatis V, Sihlimiri P, Kotsonis H, Iliadis A, Siamopoulou A, Chaliasos N.                       | Pulmonary embolism after snake bite in a child with Diamond-Blackfan anemia.                                                           | J Pediatr Hematol Oncol. 2011 | PubMed |                             | Not related to longterm effects of snakebite envenomation in the full text |

|                                                                                          |                                                                                                                                                                                          |                                  |        |                                                                            |
|------------------------------------------------------------------------------------------|------------------------------------------------------------------------------------------------------------------------------------------------------------------------------------------|----------------------------------|--------|----------------------------------------------------------------------------|
| Laothong C, Sitprija V.                                                                  | Decreased parasympathetic activities in Malayan krait ( <i>Bungarus candidus</i> ) envenoming.                                                                                           | Toxicon. 2001                    | PubMed | Not related to longterm effects of snakebite envenomation in the full text |
| Pyakurel R, Sharma N, Paudel D, Coghill A, Sindén L, Bost L, Larkin M, Burrus CJ, Roy K. | Cause of Death in Women of Reproductive Age in Rural Nepal Obtained Through Community-Based Surveillance: Is Reducing Maternal Mortality the Right Priority for Women's Health Programs? | Health Care Women Int. 2015      | PubMed | Not related to snakebite envenomation in the abstract                      |
| Harada K, Bando T, Yoshida H, Sato M.                                                    | Characteristics of antitumour activity of cepharanthin against a human adenosquamous cell carcinoma cell line.                                                                           | Oral Oncol. 2001                 | PubMed | Not related to snakebite envenomation in the abstract                      |
| Kaballo BG, Khogali MS, Khalifa EH, Khaiii EA, Ei-Hassan AM, Abu-Aisha H.                | Patterns of "severe acute renal failure" in a referral center in Sudan: excluding intensive care and major surgery patients.                                                             | Saudi J Kidney Dis Transpl. 2007 | PubMed | Not related to snakebite envenomation in the abstract                      |
| Nordlander NB.                                                                           | [How a foot wound could stop the Trojan war].                                                                                                                                            | Lakartidningen. 2004             | PubMed | No abstract available                                                      |
| Mello LF, Barcelos MG, Meohas W, Pinto LW, Melo PA, Nogueira Neto NC, Smith J.           | Chronic ulceration of the leg following extensive scarring due to a snake bite complicated by squamous cell carcinoma.                                                                   | Skeletal Radiol. 2000            | PubMed |                                                                            |
| Madhusudhanan M, Yusuff AM.                                                              | Unusual presentation of chronic idiopathic thrombocytopenic purpura.                                                                                                                     | Oman Med J. 2008                 | PubMed | Not related to the common snakebite envenomation in Taiwan                 |
| Chowhan JS.                                                                              | Chronic Snake-Bite.                                                                                                                                                                      | Ind Med Gaz. 1940                | PubMed | Not related to the common snakebite envenomation in Taiwan                 |

|                                                                                                                                                                                                 |                                                                                                                                                           |                                |        |                       |                                                            |
|-------------------------------------------------------------------------------------------------------------------------------------------------------------------------------------------------|-----------------------------------------------------------------------------------------------------------------------------------------------------------|--------------------------------|--------|-----------------------|------------------------------------------------------------|
| Das I.                                                                                                                                                                                          | Chronic Snake-Bite.                                                                                                                                       | Ind Med Gaz. 1939              | PubMed |                       | Not related to the common snakebite envenomation in Taiwan |
| Bartholdi D, Selic C, Meier J, Jung HH.                                                                                                                                                         | Viper snakebite causing symptomatic intracerebral haemorrhage.                                                                                            | J Neurol. 2004                 | PubMed | No abstract available |                                                            |
| Suda M, Yoshikawa Y, Dohi Y.                                                                                                                                                                    | [Bites, stings and food poisoning].                                                                                                                       | Nihon Rinsho. 1991             | PubMed | No abstract available |                                                            |
| Wolffers I.                                                                                                                                                                                     | Illness behaviour in Sri Lanka: results of a survey in two Sinhalese communities.                                                                         | Soc Sci Med. 1988              | PubMed |                       | Not related to snakebite envenomation in the abstract      |
| Tomov PV.                                                                                                                                                                                       | [Chronic leg ulcer caused by snake bite].                                                                                                                 | Vestn Khir Im I I Grek. 1989   | PubMed | No abstract available |                                                            |
| Anuradhani Kasturiratne, A. Rajitha Wickremasinghe, Nilanthi de Silva, N. Kithsiri Gunawardena, Arunasalam Pathmeswaran, Ranjan Premaratna, Lorenzo Savioli, David G Lalloo, H. Janaka de Silva | The Global Burden of Snakebite: A Literature Analysis and Modelling Based on Regional Estimates of Envenoming and Deaths                                  | PLoS Med. 2008                 | PubMed |                       |                                                            |
| Hung DZ                                                                                                                                                                                         | Taiwan's venomous snakebite: epidemiological, evolution and geographic differences.                                                                       | Trans R Soc Trop Med Hyg. 2004 | PubMed |                       |                                                            |
| Creer S, Malhotra A, Thorpe RS, Chou WH.                                                                                                                                                        | Multiple causation of phylogeographical pattern as revealed by nested clade analysis of the bamboo viper ( <i>Trimeresurus stejnegeri</i> ) within Taiwan | Mol Ecol. 2001                 | PubMed |                       |                                                            |
| Chen PC, Huang MN, Chang JF, Liu CC, Chen CK, Hsieh CH                                                                                                                                          | Snake venom proteome and immunoprofiling of the hundred-pace viper, <i>Deinagkistrodon acutus</i> , in Taiwan.                                            | Acta Trop. 2019                | PubMed |                       |                                                            |



|                                                                                                                           |                                                                                                                                                                            |                                         |        |
|---------------------------------------------------------------------------------------------------------------------------|----------------------------------------------------------------------------------------------------------------------------------------------------------------------------|-----------------------------------------|--------|
| Tsai YH, Hsu WH, Huang KC, Yu PA, Chen CL, Kuo LT.                                                                        | Necrotizing fasciitis following venomous snakebites in a tertiary hospital of southwest Taiwan                                                                             | Int J Infect Dis. 2017                  | PubMed |
| Gutiérrez JM, Calvete JJ, Habib AG, Harrison RA, Williams DJ, Warrell DA.                                                 | Snakebite envenoming                                                                                                                                                       | Nat Rev Dis Primers. 2017               | PubMed |
| Cheng CL, Mao YC, Liu PY, Chiang LC, Liao SC, Yang CC                                                                     | Deinagkistrodon acutus envenomation: a report of three cases                                                                                                               | J Venom Anim Toxins Incl Trop Dis. 2017 | PubMed |
| Shivaprasad C, Aiswarya Y, Sridevi A, Anupam B, Amit G, Rakesh B, Annie PA, Anish K                                       | Delayed hypopituitarism following Russell's viper envenomation: a case series and literature review                                                                        | Pituitary. 2019                         | PubMed |
| P S Priyamvada, Challa Jaswanth, Bobby Zachariah, Satish Haridasan, Sreejith Parameswaran, Rathinam Palamalai Swaminathan | Prognosis and long-term outcomes of acute kidney injury due to snake envenomation                                                                                          | Clinical Kidney Journal, 2019           | PubMed |
| Hung DZ, Wu ML, Deng JF, Lin-Shiau SY.                                                                                    | Russell's viper snakebite in Taiwan: inferences from other Asian countries                                                                                                 | Toxicon. 2002                           | PubMed |
| Zeng X, Hu J, Liang X, Wu Y, Yan M, Zhu M, Fu Y.                                                                          | Acute cerebral infarction following a Trimeresurus stejnegeri snakebite: A case report.                                                                                    | Medicine (Baltimore). 2019              | PubMed |
| Bartholdi D, Selic C, Meier J, Jung HH.                                                                                   | Viper snakebite causing symptomatic intracerebral haemorrhage                                                                                                              | J Neurol. 2004                          | PubMed |
| Srinivasan KG, Srividya S, Usha Nandhini KP, Ramprabanth S                                                                | Chronic Pituitary Failure Resembling Sheehan's Syndrome Following a Bite of Russell's Viper. A Case Report                                                                 | Neuroradiol J. 2010                     | PubMed |
| Golay V, Roychowdhary A, Dasgupta S, Pandey R.                                                                            | Hypopituitarism in patients with vasculotoxic snake bite envenomation related acute kidney injury: a prospective study on the prevalence and outcomes of this complication | Pituitary. 2014                         | PubMed |
| Antonypillai CN, Wass JA, Warrell DA, Rajaratnam HN.                                                                      | Hypopituitarism following envenoming by Russell's vipers (Daboia siamensis and D. russelii) resembling Sheehan's syndrome: first case report from Sri Lanka, a review of   | QJM. 2011                               | PubMed |

|                                                                                            |                                                                                                                                                                          |                                                   |             |                             |                               |
|--------------------------------------------------------------------------------------------|--------------------------------------------------------------------------------------------------------------------------------------------------------------------------|---------------------------------------------------|-------------|-----------------------------|-------------------------------|
|                                                                                            | the literature and recommendations for endocrine management.                                                                                                             |                                                   |             |                             |                               |
| Bartholdi D, Selic C, Meier J, Jung HH.                                                    | Viper snakebite causing symptomatic intracerebral haemorrhage.                                                                                                           | J Neurol. 2004                                    | PubMed      |                             |                               |
| Del Brutto OH                                                                              | Neurological effects of venomous bites and stings: snakes, spiders, and scorpions                                                                                        | Handb Clin Neurol. 2013                           | PubMed      |                             |                               |
| Alok Atreya, Tanuj Kanchan                                                                 | Human–Snake Encounters and Folk Remedies in Nepal                                                                                                                        | Wilderness & Environmental Medicine, 2018         | ClinicalKey |                             | Herbs not available in Taiwan |
| Gomes A, Das R, Sarkhel S, Mishra R, Mukherjee S, Bhattacharya S, Gomes A                  | Herbs and herbal constituents active against snake bite.                                                                                                                 | Indian J. Exp. Biol., 2010                        | ClinicalKey | Not available for full text |                               |
| Salama R, Sattayasai J, Gande AK, Sattayasai N, Davis M, Lattmann E                        | Identification and evaluation of agents isolated from traditionally used herbs against Ophiophagus hannah venom.                                                         | Drug Discov. Ther., 2012                          | ClinicalKey |                             | Herbs not available in Taiwan |
| David A. Warrell DM, DSc, FRCP, FRCPE, FMedSci                                             | Venomous Bites, Stings, and Poisoning                                                                                                                                    | Infectious Disease Clinics of North America, 2019 | ClinicalKey |                             |                               |
| Upasani MS, Upasani SV, Beldar VG, Beldar CG, Gujarathi PP                                 | Infrequent use of medicinal plants from India in snakebite treatment.                                                                                                    | Integr. Med. Res., 2018                           | ClinicalKey |                             | Herbs not available in Taiwan |
| Butt MA, Ahmad M, Fatima A, Sultana S, Zafar M, Yaseen G, Ashraf MA, Shinwari ZK, Kayani S | Ethnomedicinal uses of plants for the treatment of snake and scorpion bite in Northern Pakistan.                                                                         | J Ethnopharmacol, 2015                            | ClinicalKey |                             | Herbs not available in Taiwan |
| Kadir MF, Karmoker JR, Alam MR, Jahan SR, Mahbub S, Mia MM                                 | Ethnopharmacological survey of medicinal plants used by traditional healers and indigenous people in chittagong hill tracts, bangladesh, for the treatment of snakebite. | Evid Based Complement Alternat Med, 2015          | ClinicalKey |                             | Acute stage(Antivenom)        |
| Yirgu A, Chippaux JP                                                                       | Ethnomedicinal plants used for snakebite treatments in Ethiopia: a comprehensive overview.                                                                               | J Venom Anim Toxins Incl Trop Dis, 2019           | ClinicalKey |                             | Herbs not available in Taiwan |
| David A Warrell                                                                            | Snake bite                                                                                                                                                               | Lancet, The, 2010                                 | ClinicalKey |                             |                               |

|                                                                                                           |                                                                                                                         |                                                       |                |                                              |
|-----------------------------------------------------------------------------------------------------------|-------------------------------------------------------------------------------------------------------------------------|-------------------------------------------------------|----------------|----------------------------------------------|
| E.J. Lavonas, W.P. Kerns, C.J. Gerardo, W. Richardson, K. Whitlow, D.J. Berkoff                           | 328: Long-Term Limb Function Outcomes Following Copperhead Snakebite                                                    | Annals of Emergency Medicine, 2008                    | ClinicalKey    | The effect of antivenom but not TCM          |
| Susanne J. Spano MD, Rais Vohra MD, Fernando Macias MD                                                    | Long-Term Complications of Rattlesnake Bites: A Telephone Survey From Central California                                | Wilderness & Environmental Medicine, 2014             | ClinicalKey    |                                              |
| Jayawardana S, Arambepola C, Chang T, Gnanathan A                                                         | Long-term health complications following snake envenoming.                                                              | J Multidiscip Healthc, 2018                           | ClinicalKey    |                                              |
| Richard T. Tovar, Renee M. Petzel Phar                                                                    | Herbal Toxicity                                                                                                         | Disease-a-Month, 2009                                 | ClinicalKey    | Not related to snakebite envenomation        |
| Rajendran Silambarasan, Jeyalatchagan Sureshkumar, Jayaraj Krupa, Singamoorthy Amalraj, Muniappan Ayyanar | Traditional herbal medicines practiced by the ethnic people in Sathyamangalam forests of Western Ghats, India           | European Journal of Integrative Medicine, 2017        | ClinicalKey    | Herbs not available in Taiwan                |
| Jeyalatchagan Sureshkumar, Rajendran Silambarasan, Muniappan Ayyanar                                      | An ethnopharmacological analysis of medicinal plants used by the Adiyani community in Wayanad district of Kerala, India | European Journal of Integrative Medicine, 2017        | ClinicalKey    | Herbs not available in Taiwan                |
| Coe FG, Anderson GJ                                                                                       | Snakebite ethnopharmacopoeia of eastern Nicaragua.                                                                      | J Ethnopharmacol, 2005                                | ClinicalKey    | Herbs not available in Taiwan                |
| Yi-Chiao Lee, Ting-Hao Wang, Shih-Yu Chen, Hsiang-Ling Lin, Ming-Yen Tsai                                 | Management of viral oral ulcers in children using Chinese herbal medicine: A report of two cases                        | Complementary Therapies in Medicine, 2017             | ClinicalKey    | Not related to snakebite envenomation        |
| Marilena Gilca, George Sorin Tiplica, Carmen Maria Salavastru                                             | Traditional and ethnobotanical dermatology practices in Romania and other Eastern European countries                    | Clinics in Dermatology, 2018                          | ClinicalKey    | Not related to snakebite envenomation        |
| Chi-Wen Juan                                                                                              | Venomous Snake Bites in Taiwan                                                                                          | Journal of Emergency and Critical Care Medicine, 2012 | Airiti Library |                                              |
| Bor-Lin Miao, Ruey-Jen Huang, Men-Shing Hu, Ming-Yi Liau                                                  | Venomous Snake Bites in Taiwan (1988-1991) (Chinese)                                                                    | Chinese Journal of Public Health, 1995                | Airiti Library | Not related to longterm effects of snakebite |

|                                                                                                                                   |                                                                                                                     |                                                          |                |                                                                           |
|-----------------------------------------------------------------------------------------------------------------------------------|---------------------------------------------------------------------------------------------------------------------|----------------------------------------------------------|----------------|---------------------------------------------------------------------------|
|                                                                                                                                   |                                                                                                                     |                                                          |                | envenomation in the abstract                                              |
| Kao-Ping Chang, Chung-Sheng Lai, Sin-Daw Lin                                                                                      | Management of Poisonous Snake Bites in Southern Taiwan                                                              | The Kaohsiung Journal of Medical Sciences, 2007          | Airiti Library |                                                                           |
| Meng-Si Wu, Jiunn-Tat Lee, Tzong-Bor Sun, Li-Fu Cheng, Chien-Hsing Wang, Hon-Da Hsu, Chieh-Chi Huang, Sou-Hsin Chien              | Treatment of Venomous Snakebites in Eastern Taiwan                                                                  | The Journal of Plastic Surgical Association R.O.C., 2009 | Airiti Library | Not related to longterm effects of snakebite envenomation in the abstract |
| Yu-Chung Shih, Hsu Ma, Fa-Lai Yeh, Jin-The Lin, Chih-Hung Hwang, Mau-Shan Wang, Cherng-Kang Perng, Bing-Hwei Shen, Chien-Hua Chen | Risk Factors of Surgical Intervention in the Management of Venomous Snakebite in Northern Taiwan                    | The Journal of Plastic Surgical Association R.O.C., 2006 | Airiti Library | Not related to longterm effects of snakebite envenomation in the abstract |
| Chao-Hung Ho                                                                                                                      | Common snake bite in Taiwan (Chinese)                                                                               | Health World, 2001                                       | Airiti Library | Not related to longterm effects of snakebite envenomation in the abstract |
| Ko Cheng                                                                                                                          | Prevention and treatment of bite by viper snake in Taiwan (Chinese)                                                 | Family Medicine & Primary Medical Care, 2018             | Airiti Library | Not related to longterm effects of snakebite envenomation in the abstract |
| Yen-Long Chen                                                                                                                     | I'm Innocent- Simple Identification of the Similar Species of Poisonous and Nonpoisonous Snakes in Taiwan (Chinese) | Nature Conservation Quarterly, 2011                      | Airiti Library | Not related to longterm effects of snakebite envenomation in the abstract |
| Wei-Jone Liang, Yeou-Ming Tung, Hsian-Jenn Wang                                                                                   | Treatment of Snakebite in Taiwan-Analysis of 100 Cases (Chinese)                                                    | Journal of Medical Sciences, 1992                        | Airiti Library | Not related to longterm effects of snakebite                              |

|                                                                                         |                                                                                                                                                                                |                                                                 |                |                             |                                                                                                           |
|-----------------------------------------------------------------------------------------|--------------------------------------------------------------------------------------------------------------------------------------------------------------------------------|-----------------------------------------------------------------|----------------|-----------------------------|-----------------------------------------------------------------------------------------------------------|
| Wei-Heng Chang, Francis F.S. Wu, Chi-Wen Juan, Tom C.N. Lee, Chu-Chung Chou, Sai-Kit Ho | Snakebite - Induced Transient Arterial Hypertension                                                                                                                            | Journal of Emergency and Critical Care Medicine, 2000           | Airiti Library |                             | envenomation in the abstract<br>Not related to longterm effects of snakebite envenomation in the abstract |
| Chuan-Hui Yu, Jer-Kan Wu                                                                | Nursing Care of Patients with Poisonous Snakebites (Chinese)<br>The Respiratory Care for Acute Respiratory Failure in the Patient Envenomed by Bungarus Multicinctus (Chinese) | VGH Nursing, 2000                                               | Airiti Library |                             | Nursing                                                                                                   |
| Ting, M.J.; Chu, C.C.; Hsu, Y.L.; Tian, A.C.; Wang, P.H.                                | The Respiratory Care for Acute Respiratory Failure in the Patient Envenomed by Bungarus Multicinctus (Chinese)                                                                 | Journal of Respiratory Therapy, 2017                            | Airiti Library |                             |                                                                                                           |
| Chia-Meng Yu, Wen-Chen Huang, Kwang-Yi Tung, Hung-Tao Hsiao, Shuan-Yuan Ou              | Prognostic Factors of Local Necrosis Due to Poisonous Snakebite-A Clinical Review in Mackay Memorial Hospital                                                                  | The Journal of Plastic Surgical Association R.O.C., 2005        | Airiti Library |                             | Not related to longterm effects of snakebite envenomation in the abstract                                 |
| Gian-Kaw Lee, Ming-Ling Wu, Jou-Fang Deng, Wei-Jen Tsai, How-Chin Liao, Shiumn-Jen Liao | Taiwan Cobrai(Naja naja atra)injury - Cases analysis of Poison Control Center -                                                                                                | Journal of Taiwan Emergency Medicine, 2000                      | Airiti Library | Not available for full text |                                                                                                           |
| Chin-Yi Chen, Kung-Ta Lee, Tsu-Hwie Liu, Wen-Hsiung Liu                                 | Callus Induction of Podophyllum pleianthum Hance and the Detection of Podophyllotoxin (Chinese)                                                                                | Taiwan Journal of Agricultural Chemistry and Food Science, 2004 | Airiti Library |                             | Not related to snakebite envenomation in the abstract                                                     |
| Hsu, Y.L.; Wu, C.J.; Chou, T.C.; Hsieh, W.C.; Cheng, Y.F.; Chiang, C.J.                 | Review and Prospect of Antivenom Serum Manufacturing in Taiwan (Chinese)                                                                                                       | Taiwan Epidemiology Bulletin, 2013                              | Airiti Library |                             | Not related to longterm effects of snakebite envenomation in the abstract                                 |

|                                                                               |                                                                                                                                                              |                                                       |                |                                                                           |
|-------------------------------------------------------------------------------|--------------------------------------------------------------------------------------------------------------------------------------------------------------|-------------------------------------------------------|----------------|---------------------------------------------------------------------------|
| Liu, C.H.; Li, C.J.; Li, J.; Hsu, C.L.; Chen, C.H.; Chang, H.C.; Hsieh, W.C.  | Application of snake venom protein and anti-venom serum manufacturing technology (Chinese)                                                                   | Taiwan Epidemiology Bulletin, 2015                    | Airiti Library | Not related to longterm effects of snakebite envenomation in the abstract |
| Ruo-Wen Li                                                                    | An Anthropological Discourse Analysis of "Vūruns and Kamavanans" in Paiwan Language: A Case Study on In Kanori's Investigation Reports (1900-1910) (Chinese) | Taiwan Journal of Anthropology, 2015                  | Airiti Library | Not related to snakebite envenomation                                     |
| Yaw-Wen Guo, Yu-Chi Lin, Tseng-Yuan Chang, Hwan-Wan Liu                       | Secretion Mechanism of Snake Venom-Speculation on Clonal Theory (Chinese)                                                                                    | Journal of Medical Sciences, 1996                     | Airiti Library | Not related to longterm effects of snakebite envenomation in the abstract |
| Chun-Ching Lin, Jer-Min Lin, Jeng-Jer Yang                                    | The Pharmacognostical Studies on Folkmedicine "Thang-Kau-Tin" from Taiwan (Chinese)                                                                          | Journal of Chinese Medicine, 1995                     | Airiti Library | Not related to snakebite envenomation in the abstract                     |
| Chi-Wen Juan, Francis FS Wu, Wei-Heng Chang, Tom Chao-Nan Lee, Chu-Chung Chou | A Case of Envenomation by Bungarus Multicinctus                                                                                                              | Journal of Emergency and Critical Care Medicine, 1999 | Airiti Library |                                                                           |
| Ting, M.J.; Tian, A.C.; Chu, C.C.; Hsu, Y.L.; Wang, P.H.                      | The Respiratory Care for Acute Upper Airway Obstruction and Respiratory Failure in the Patient Bitten by Protothrips Mucrosquamatus (Chinese)                | Journal of Respiratory Therapy, 2017                  | Airiti Library |                                                                           |
| Wen-Ying Chao, Yi-Hung Liu, Jung-Der Wang                                     | Trend of Cumulative Mortality Rate and Years of Potential Life Loss (YPLL) of Poisoning during 1974-1990 in Taiwan (Chinese)                                 | Chinese Journal of Public Health, 1993                | Airiti Library | Not related to longterm effects of snakebite envenomation in the abstract |

|                                                      |                                                                                                                                      |                                                                        |                |                                                                           |
|------------------------------------------------------|--------------------------------------------------------------------------------------------------------------------------------------|------------------------------------------------------------------------|----------------|---------------------------------------------------------------------------|
| Hung-Chun Che, Yung-Hsiung Lai, Juei-Hsiung Tsai     | Acute Renal Failure Following Russell's Viper Envenomation: A Report of Two Cases                                                    | The Kaohsiung Journal of Medical Sciences, 1988                        | Airiti Library |                                                                           |
| Huei-Lin Huang, Lea-Yea Chuang, Chun-Chang Chang     | Immunological Cross-Reactivity of Phospholipase A2 from Snake Venoms                                                                 | The Kaohsiung Journal of Medical Sciences, 1985                        | Airiti Library | Not related to longterm effects of snakebite envenomation in the abstract |
| Yu-Wen Lin, Ming-Yi Lee, Li-Wen Wei, Cheng-Pei Chung | Influence on Chemical Composition of Anoctochilus formosanus Hayata. Water Extract Treated with Multi-Frequency Ultrasound (Chinese) | Journal of China University of Science and Technology, 2019            | Airiti Library | Not related to snakebite envenomation in the abstract                     |
| Liu, C.K.; Chen, C.P.                                | Acute renal failure due to snake bite (Chinese)                                                                                      | Kidney and Dialysis, 2004                                              | Airiti Library | No related to TCM                                                         |
| Cheng, S.F.; Lin, H.L.                               | Epidemiology and treatment of snake bite (Chinese)                                                                                   | Taiwan Medical Journal, 2010                                           | Airiti Library | Not related to longterm effects of snakebite envenomation in the abstract |
| Yang, H.C.; Li, C.T.                                 | Identification and Quality Control Method of Turtle Shell Flower and Red Tail Snake Venom in Taiwan (Chinese)                        | Taiwan Epidemiology Bulletin, 2016                                     | Airiti Library | Not related to longterm effects of snakebite envenomation in the abstract |
| Wen-Loung Lin, Hui-Yun Tseng, Chii-Jenq Tzeng        | Fast, Accurate and Safe Measurement of Snake Body Length by Computer Image Analysis                                                  | Journal of the Experimental Forest of National Taiwan University, 2006 | Airiti Library | Not related to snakebite envenomation in the abstract                     |
| Kun-Jong Lee, Gieh-Hwa Lu                            | From "The Serpent's Lair" to "The Axis of Evil": Doubts about American Rhetoric in Korean University Classes (Chinese)               | CHUNG WAI LITERARY, 2003                                               | Airiti Library | Not related to snakebite envenomation in the abstract                     |

|                                                |                                                                                                                                  |                                                          |                |                             |                                                                            |
|------------------------------------------------|----------------------------------------------------------------------------------------------------------------------------------|----------------------------------------------------------|----------------|-----------------------------|----------------------------------------------------------------------------|
| Liu, C.H.; Chiang, T.H.; Lien, W.C.; Liu, T.P. | Analysis of rickets using anti-venom serum in Taiwan from 2002 to 2005 (Chinese)                                                 | Taiwan Epidemiology Bulletin, 2009                       | Airiti Library |                             | Not related to longterm effects of snakebite envenomation in the abstract  |
| Tsung-Hsien Tsai                               | The Development of Buddhism in Mt. Sheshan from the Fifth to Seventh Centuries (Chinese)                                         | Bulletin of Historical Research, 2016                    | Airiti Library |                             | Not related to snakebite envenomation in the abstract                      |
| Wen-Pei Tseng                                  | Studies on Signal Transduction Pathway of $\beta$ -Bungarotoxin-induced Neurotoxicity in the Cultured Cerebellar Granule Neurons | Doctoral thesis, National Taiwan University, June 2002   | NTLTD          |                             | Not related to longterm effects of snakebite envenomation in the full text |
| Yen-Chia Chen                                  | Study on the Antivenom Treatment and Prognosis of Patients with Crotaline Snake Envenoming in Taiwan                             | Master thesis, National Yang-Ming University, June 2007  | NTLTD          | Not available for full text |                                                                            |
| Chu, Y.P.                                      | Taiwan Banded Krait $\beta$ -Bungarotoxins: Novel Isotoxins, Targeting and Gene Organization                                     | Master thesis, National Sun Yat-sen University, May 2002 | NTLTD          |                             | Not related to longterm effects of snakebite envenomation in the full text |
| Dong-Zong Hung                                 | Studies on the Diagnosis, Treatment and Toxic Mechanism of Taiwan Venomous Snakebites                                            | Doctoral thesis, National Taiwan University, 2002 July   | NTLTD          |                             |                                                                            |
| Chun-Yu Jen                                    | Role of Taiwan cobra cardiotoxins internalization on cardiomyocyte H92C cells cytotoxicity                                       | Master thesis, National Tsing Hua University, 2008 Aug.  | NTLTD          |                             | Not related to longterm effects of snakebite envenomation in the full text |



|                                                                   |                                                                                                                                                  |                                                                     |       |                             |                                                                            |
|-------------------------------------------------------------------|--------------------------------------------------------------------------------------------------------------------------------------------------|---------------------------------------------------------------------|-------|-----------------------------|----------------------------------------------------------------------------|
| Ying-Hui Wang                                                     | Taiwan Cobra Venom Induced Intracellular Calcium Increase and Its Biological Implication                                                         | Master thesis, National Tsing Hua University, 2003 July             | NTLTD |                             | Not related to longterm effects of snakebite envenomation in the full text |
| -                                                                 | A Study on the Relationship between Chemical Structure and Lethal Effect of Taiwan Cobra Neurotoxin (Chinese)                                    | -                                                                   | NTLTD | Not available for full text |                                                                            |
| -                                                                 | Effects of Trimeresurus mucrosquamatus and Deinagkistrodon acutus Venom on Blood Coagulation and Platelet Red Blood Cell Agglutination (Chinese) | -                                                                   | NTLTD | Not available for full text |                                                                            |
| Lin, Y.P.                                                         | The cytotoxicity and myotoxicity analysis of toxic proteins from East and West Taiwan Cobra(Naja naja atra)                                      | Master thesis, National Tsing Hua University, 2004 July             | NTLTD |                             |                                                                            |
| Lan-Hui Chih                                                      | Pharmacological Studies of Phospholipase A2, Isolated from Russell's Vipers, on Smooth Muscle                                                    | Master thesis, National Taiwan University, 2001 June                | NTLTD |                             | Not related to longterm effects of snakebite envenomation in the full text |
| Tsao, S.N.; Kung, H.C.                                            | Research progress in treatment of snakebite with traditional Chinese medicine (Chinese)                                                          | Journal of Snake, 2019                                              | CNKI  |                             | Not related to longterm effects of snakebite envenomation in the full text |
| Hsu, L.H.; Chu, W.F.; Shen, A.; Chen, L.H.; Chin, C.              | Research Progress on Traditional Chinese Medicine External Treatment of the Swelling Caused by Venomous Snakebite (Chinese)                      | Journal of Jiangxi University of Traditional Chinese Medicine, 2018 | CNKI  |                             | External use                                                               |
| Wang, C.C.; Chen, S.T.; Wu, S.J.; Chen, P.; Yen, C.J.; Wang, W.C. | Wang Wanchun's Experience in Comprehensive Treatment of Snake Bites                                                                              | Guangming Journal of Chinese Medicine, 2017                         | CNKI  |                             | Not related to longterm effects of                                         |

|                                                               | with Traditional Chinese Medicine<br>(Chinese)                                                                                                                                                                                  |                                                                                 |      | snakebite<br>envenomation in the<br>full text      |
|---------------------------------------------------------------|---------------------------------------------------------------------------------------------------------------------------------------------------------------------------------------------------------------------------------|---------------------------------------------------------------------------------|------|----------------------------------------------------|
| Yi, W.; Ching, F.H.; Su, C.T.                                 | Application of standardized Chinese<br>medicine hoop in patients with bite by<br>viper (Chinese)                                                                                                                                | Medical Equipment,<br>2017                                                      | CNKI | Nursing                                            |
| Chang, T.S.                                                   | Observation on effect of traditional<br>Chinese medicine snake wound fumigant<br>lotion on swelling of limbs caused by<br>snakebite (Chinese)                                                                                   | Chinese Journal of<br>Clinical Rational Drug<br>Use, 2017                       | CNKI | External use                                       |
| Chiang, Y.F.                                                  | Effect of steam bath treatment on limb<br>swelling after snakebite envenomation<br>(Chinese)                                                                                                                                    | Clinical Journal of<br>Chinese Medicine, 2015                                   | CNKI | External use                                       |
| Jiang, H.Y.; Rong, C.L.; Pan, J.E.; Zhong, J.R.; Xie,<br>W.Q. | Clinical observation of curative effect of the<br>WAIXIYIFANG of traditional Chinese<br>medicine combined with different leaf<br>mixture in treating local swelling on the<br>limbs caused by venomous snake bites<br>(Chinese) | China Modern Medicine,<br>2013                                                  | CNKI | External use                                       |
| Chuang, H.; Chen, T.F.; Ho, H.C.                              | Shejue Jiedu Powder as an adjuvant<br>treatment for 47 cases of snake bite<br>(Chinese)                                                                                                                                         | Guangming Journal of<br>Chinese Medicine, 2013                                  | CNKI | External use                                       |
| Yao, K.M.; Hu, J.H.                                           | Therapeutic effect of blood purification<br>combined with external application of<br>traditional Chinese medicine on 33 cases of<br>severe poisonous snake bites (Chinese)                                                      | Chinese Journal of<br>Integrated Traditional<br>and Western<br>Nephrology, 2012 | CNKI | External use                                       |
| Wu, T.C.; Chou, W.C.; Liu, Y.P.; Yu, C.; Chiang, L.Y.         | Practice of standard traditional Chinese<br>herbs hooping care in patients with<br>poisonous snakebite (Chinese)                                                                                                                | Chinese Nursing<br>Research, 2012                                               | CNKI | Nursing                                            |
| Huang, N.; Wu, K.C.; Yang, Y.L.; Su, Y.H.                     | Advances in Research Chinese Medical<br>Treatment of Snakebite (Chinese)                                                                                                                                                        | Journal of Liaoning<br>University of Traditional<br>Chinese Medicine, 2010      | CNKI | Not related to<br>longterm effects of<br>snakebite |

|                                         |                                                                                                                                                      |                                                                                                     |      |                             | envenomation in the full text |
|-----------------------------------------|------------------------------------------------------------------------------------------------------------------------------------------------------|-----------------------------------------------------------------------------------------------------|------|-----------------------------|-------------------------------|
| Li, Y.L.                                | Treatment of 256 cases of poisonous snake bites with traditional Chinese medicine and homemade negative pressure drug inhaler (Chinese)              | Journal of Emergency in Traditional Chinese Medicine, 2004                                          | CNKI | No abstract available       |                               |
| Wang, S.P.                              | Antivenoms combined with traditional Chinese medicine for 114 cases of snake bite (Chinese)                                                          | Journal of Snake, 2003                                                                              | CNKI | No abstract available       |                               |
| Li, H.L.                                | Clinical Observation on 30 Cases of Venomous Snake Bites Treated by Integrated Traditional Chinese and Western Medicine (Chinese)                    | Chinese Journal of Integrated Traditional and Western Medicine in Intensive and Critical Care, 1994 | CNKI |                             | External use                  |
| Yang, C.C.                              | Traditional Chinese medicine Semen Euphorbiae Lathyridis for snake bite (Chinese)                                                                    | Henan Traditional Chinese Medicine, 1982                                                            | CNKI | Not available for full text |                               |
| Fang, Y.Y.; Li, H.L.                    | Traditional Chinese medicine Hsiung-Chih-San for snake bite (Chinese)                                                                                | Jiangxi Medical Journal, 1965                                                                       | CNKI | Not available for full text |                               |
| Shih, T.Y.; Chen, C.; Yu, Y.; Chu, M.S. | Effect of continuous moist therapy with Chinese medicine in treating snake bite (Chinese)                                                            | Journal of Traumatic Surgery, 2018                                                                  | CNKI |                             | External use                  |
| Cheng, P.Y.; Cheng, S.L.                | Observation and Nursing of Traditional Chinese Medicine Steam Bath Formula in Treating Local Swelling and Pain Caused by Venom Snake Bites (Chinese) | Nei Mongol Journal of Traditional Chinese Medicine, 2015                                            | CNKI |                             | External use                  |
| Luan, K.T.; Tan, Y.A.; Li, C.K.         | Treatment of Snakebite in Community Hospital (Chinese)                                                                                               | Journal of Snake, 2012                                                                              | CNKI |                             | External use                  |

|                                                       |                                                                                                                               |                                                            |      |                             |                                                                            |
|-------------------------------------------------------|-------------------------------------------------------------------------------------------------------------------------------|------------------------------------------------------------|------|-----------------------------|----------------------------------------------------------------------------|
| Li, H.; Hsiao, C.L.; Chou, C.; Sung, H.; Feng, C.L.   | Effects of different medical care on efficacy of Chinese encircles spreads for local puncturing caused by snakebite (Chinese) | Nursing Practice and Research, 2010                        | CNKI |                             | Nursing                                                                    |
| Kang, N.                                              | Analysis of Clinical Data of Integrated Traditional Chinese and Western Medicine in Treating Venomous Snake Bites (Chinese)   | Chinese Journal of Ethnomedicine and Ethnopharmacy, 2009   | CNKI |                             | Not related to longterm effects of snakebite envenomation in the full text |
| Sung, H.; Chuan, L.; Liu, H.L.; Chou, C.; Hsiao, C.L. | Observation of curative effect of modified dressing on local tissue damage caused by bite (Chinese)                           | Journal of Emergency in Traditional Chinese Medicine, 2008 | CNKI |                             | External use                                                               |
| Cho, H.Y.; Kung, P.S.                                 | Experience in rescue of 291 cases of poisonous snake bite by integrated traditional Chinese and western medicine (Chinese)    | China Journal of Modern Medicine, 2005                     | CNKI |                             | Nursing                                                                    |
| Hsu, Y.H.                                             | Traditional Chinese medicine as a main treatment in 35 cases of myocardial damage caused by snake bite (Chinese)              | Chinese Journal of Integrative Medicine, 1990              | CNKI | Not available for full text |                                                                            |
| Wang, H.M.                                            | Traditional Chinese medicine as a main treatment in 124 cases of snakebite envenomation (Chinese)                             | Journal of Anhui Traditional Chinese Medical College, 1993 | CNKI | Not available for full text |                                                                            |
| Li, C.W.                                              | 100 cases of snakebite envenomation treated by Chinese herbal medicine Lindernia crustacea (Chinese)                          | Guangxi Journal of Traditional Chinese Medicine, 1984      | CNKI | Not available for full text |                                                                            |
| Wang, P.P.                                            | Effect of ear-buried beans on relieving pain in 35 patients with snake bite (Chinese)                                         | Renowned Doctor, 2019                                      | CNKI |                             | No related to TCM                                                          |
| Lan, P.; Hung, H.P.; Chen, Y.; Lai, L.C.; Tu, W.      | Effect analysis of different Traditional Chinese Medicine external methods in the                                             | Zhejiang Journal of Traumatic Surgery, 2019                | CNKI |                             | External use                                                               |

|                                                   |                                                                                                                                                                                                                        |                                                                   |      |                             |                                                                            |
|---------------------------------------------------|------------------------------------------------------------------------------------------------------------------------------------------------------------------------------------------------------------------------|-------------------------------------------------------------------|------|-----------------------------|----------------------------------------------------------------------------|
| Hsieh, H.H.                                       | treatment of patients with hemotoxic snakebite envenomation (Chinese)<br>Therapeutic effect of external application of traditional Chinese medicine on swelling and pain in limbs of snake bites in 38 cases (Chinese) | Hunan Journal of Traditional Chinese Medicine, 2013               | CNKI |                             | External use                                                               |
| Chen, S.; Yeh, H.T.; Hsiung, K.                   | Clinical Observation of Treatment Effect on Acute Respiratory Failure Patients by Traditional Chinese and Western Medicine (Chinese)                                                                                   | Journal of Snake, 2008                                            | CNKI |                             | Not related to longterm effects of snakebite envenomation in the full text |
| -                                                 | Chinese Medicine Information (Chinese)                                                                                                                                                                                 | Journal of Traditional Chinese Medicine, 1990                     | CNKI | No abstract available       |                                                                            |
| Chou, W.C.; Wu, T.C.; Liu, Y.P.; Yu, C.; Tang, L. | Nursing analysis of 22 cases with poisonous snake bite handling with Traditional Chinese herbs hooping (Chinese)                                                                                                       | Chinese Nursing Research, 2010                                    | CNKI |                             | Nursing                                                                    |
| Wang, W.                                          | Report on 36 Cases of Detoxification and Detoxification of Traditional Chinese Medicine for Treatment of Snake Bites (Chinese)                                                                                         | Clinical Journal of Traditional Chinese Medicine, 2004            | CNKI |                             | Not related to longterm effects of snakebite envenomation in the full text |
| Tseng, S.Y.                                       | 18 cases of snakebite envenomation treated with traditional Chinese medicine (Chinese)                                                                                                                                 | Journal of Traditional Chinese Medicine University of Hunan, 1996 | CNKI |                             | Not related to longterm effects of snakebite envenomation in the full text |
| Tai, W.T.                                         | Experience in treating snake bites (Chinese)                                                                                                                                                                           | Journal of Guiyang College of Traditional Chinese Medicine, 1989  | CNKI | Not available for full text |                                                                            |

|                                                  |                                                                                                                                                                  |                                                                             |      |                             |                                                                            |
|--------------------------------------------------|------------------------------------------------------------------------------------------------------------------------------------------------------------------|-----------------------------------------------------------------------------|------|-----------------------------|----------------------------------------------------------------------------|
| -                                                | Rhizoma Paridis - King of Treatment of Snakebite envenomation (Chinese)                                                                                          | Chinese Medicine Modern Distance Education of China, 2013                   | CNKI | No abstract available       |                                                                            |
| Lu, T.K.; Liao, T.Y.; Teng, W.C.                 | Antivenom combined with traditional Chinese medicine for 114 cases of snake bite (Chinese)                                                                       | Guangdong Medical Journal, 2002                                             | CNKI |                             | Use internal, injection and external TCM at the same time                  |
| Kao, T.                                          | Clinical experience of steam bath with traditional Chinese medicine in treating joint stiffness at the late stage of fracture (Chinese)                          | Zhejiang Journal of Traumatic Surgery, 2012                                 | CNKI |                             | Not related to snakebite envenomation in the abstract                      |
| Shih, W.L.; Huang, H.P.; Wang, S.C.              | Clinical study on TCM snakebite fumigating and washing lotion in treating limbs swelling after snakebite (Chinese)                                               | Journal of Snake, 2012                                                      | CNKI |                             | External use                                                               |
| Liu, M.C.                                        | Sixteen flavors of traditional Chinese medicine for 25 cases of snake bite (Chinese)                                                                             | Journal of Snake, 2001                                                      | CNKI |                             | Acute satge/Use internal and external TCM at the same time                 |
| Yu, L.L.; Ho, C.C.                               | Clinical study of traditional Chinese medicine and Yao medicine in combination with regular western medicine on swelling and ulcer caused by snakebite (Chinese) | Pharmacy Today, 2016                                                        | CNKI |                             | Not related to longterm effects of snakebite envenomation in the full text |
| Chang, L.F.; Tseng, C.Y.; Huang, P.; Chang, S.P. | Research Preparation and Clinic Application of Sheshang I Mixture (Chinese)                                                                                      | Journal of Snake, 2004                                                      | CNKI |                             | External use                                                               |
| Fu, J.C.; Lin, C.C.                              | Experience in treating snake bites (Chinese)                                                                                                                     | Fujian Journal of Traditional Chinese Medicine (TCN), 1963                  | CNKI | Not available for full text |                                                                            |
| Pan, L.P.; Wang, L.C.                            | Observation and nursing of traditional Chinese medicine medicated bath on skin ulcer of affected limb of snake bite (Chinese)                                    | Modern Journal of Integrated Traditional Chinese and Western Medicine, 2008 | CNKI |                             | External use                                                               |

|                                                            |                                                                                                                                      |                                                                             |      |                             |                                                                            |
|------------------------------------------------------------|--------------------------------------------------------------------------------------------------------------------------------------|-----------------------------------------------------------------------------|------|-----------------------------|----------------------------------------------------------------------------|
| Yang, H.; Huang, H.P.; Chiang, S.; Wang, C.C.              | Clinical Drug Treatment of 87 Cases of Acute Renal Failure Caused by Snake Injury (Chinese)                                          | Jilin Medical Journal, 2012                                                 | CNKI |                             | Not related to longterm effects of snakebite envenomation in the full text |
| Ho, L.C.; Chen, H.                                         | Introduce several Chinese herbs for treating snake wounds (Chinese)                                                                  | Strait Pharmaceutical Journal, 2007                                         | CNKI | Not available for full text |                                                                            |
| Meng, H.                                                   | Mailuoning for the treatment of foot swollen by viper bite in 32 cases (Chinese)                                                     | Journal of Snake, 1999                                                      | CNKI |                             | Not related to longterm effects of snakebite envenomation in the full text |
| Lu, L.M.; Lu, C.J.                                         | Analysis of Detoxification of Lablab Semen Album. (Chinese)                                                                          | Chinese Medicine Modern Distance Education of China, 2014                   | CNKI |                             | Not related to snakebite envenomation                                      |
| Ling, K.M.                                                 | Clinical observation of external application of Maotian Qi and Da Huang in the treatment of snake wounds (Chinese)                   | Modern Journal of Integrated Traditional Chinese and Western Medicine, 2009 | CNKI |                             | External use                                                               |
| Wu, F.; Wang, W.C.; Sun, P.; Chiang, H.; Liu, L.; Wang, H. | Experience of traditional Chinese medicine decomposing debridement in treating snake wound ulcers (Chinese)                          | Guangming Journal of Chinese Medicine, 2019                                 | CNKI |                             | External use                                                               |
| Chiang, H.P.                                               | Treatment of 34 Cases of Critical Illness by Five-step Snake Bite with Integrated Traditional Chinese and Western Medicine (Chinese) | Journal of Snake, 1998                                                      | CNKI |                             | Not related to longterm effects of snakebite envenomation in the full text |
| -                                                          | Latest Chinese Patent Abstracts (Chinese)                                                                                            | Science-Technical on Middle-Small Business, 2000                            | CNKI | Not available               |                                                                            |

---

for full  
text

---

TCM: Traditional Chinese Medicine; NDLTD: National Digital Library of Theses and Dissertations in Taiwan; CNKI: China National Knowledge Infrastructure.
